# Supplementary material for: Introducing photo-crosslinked bio-nanocomposites based on polyvinylidene fluoride/poly(glycerol azelaic acid)-g-glycidyl methacrylate for bone tissue engineering
Source: Royal Society of Chemistry journal article supplement (doi:10.1039/d2tb01628a), 2022-12-05
Supplement: d2tb01628a1.pdf [file d2tb01628a1.pdf]

## Supplementary Information

### **Introducing Photo-crosslinked Bio-Nanocomposites based on Polyvinylidene fluoride /Poly(glycerol azelaic acid)-g-Glycidyl methacrylate for Bone Tissue Engineering**

Vafa Fakhri,<sup>a</sup> Aliakbar Jafari,<sup>a</sup> Ali Zeraatkar,<sup>a</sup> Maryam Rahimi,<sup>b</sup> Hooriyeh Hadian,<sup>b</sup> Sasan Nouranian,<sup>c</sup> Benjamin Kruppke,<sup>d</sup> Hossein Ali Khonakdar <sup>d,e\*</sup>

<sup>a</sup> Department of Polymer Engineering & Color Technology, Amirkabir University of Technology, Tehran, Iran

<sup>b</sup> Department of Chemical Engineering, Faculty of Technical and Engineering, Islamic Azad University, Central Tehran Branch, Tehran, Iran.

<sup>c</sup> Department of Chemical Engineering, University of Mississippi, University, MS 38677, United States

<sup>d</sup> Max Bergmann Center of Biomaterials and Institute of Materials Science, Technische Universität Dresden, 01069 Dresden, Germany

<sup>e</sup> Department of Polymer Processing, Iran Polymer and Petrochemical Institute, Tehran, Iran

\*Correspondence to H. A. Khonakdar ([hakhonakdar@gmail.com](mailto:hakhonakdar@gmail.com))

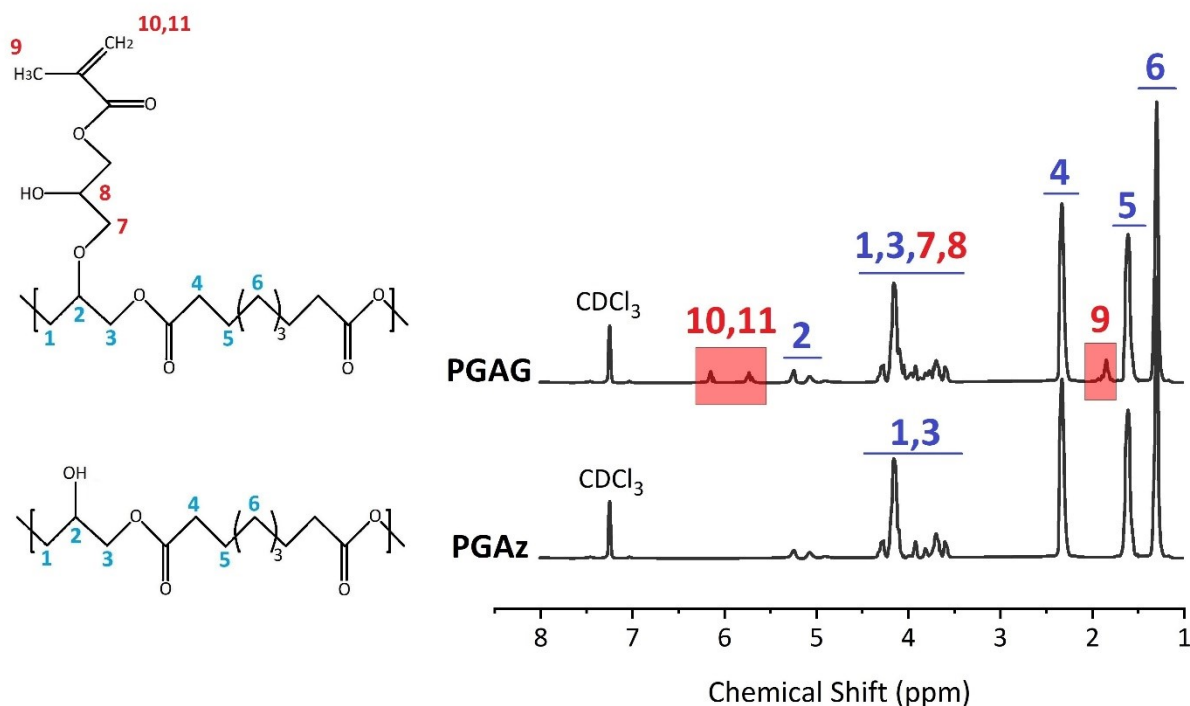

**Figure S1.**  $^1\text{H}$  NMR spectrum of PGAz and PGAG.

**Table S1.** Thermal parameters of the prepared samples evaluated from the cooling and second heating DSC curves.

| Sample           | $T_g$ ( $^{\circ}\text{C}$ ) | $T_g$ ( $^{\circ}\text{C}$ ) | $T_m$ Peak             | $T_m$ Range ( $^{\circ}\text{C}$ ) | $\Delta H_m$ (J/g) | $X_c$ (%) | $T_c$ Peak             | $T_c$ Range ( $^{\circ}\text{C}$ ) |
|------------------|------------------------------|------------------------------|------------------------|------------------------------------|--------------------|-----------|------------------------|------------------------------------|
|                  | [PGAG]                       | [PVDF]                       | ( $^{\circ}\text{C}$ ) | [PVDF]                             | [PVDF]             | [PVDF]    | ( $^{\circ}\text{C}$ ) | [PVDF]                             |
| PGAG             | -23.3                        | -                            | -                      | -                                  | -                  | -         | -                      | -                                  |
| PVDF             | -                            | -32.6                        | 169.9                  | 157.4 to 178.0                     | 64.2               | 61.4      | 140.0                  | 150.3 to 116.9                     |
| PGAG/PVDF        | -                            | -                            | 165.7                  | 151.7 to 172.4                     | 27.6               | 52.8      | 136.5                  | 143.6 to 113.8                     |
| PGAG/PVDF/nHA    | -                            | -                            | 167.3                  | 156.9 to 174.8                     | 29.8               | 58.8      | 138.3                  | 145.4 to 122.5                     |
| PGAG/PVDF/Clay   | -                            | -                            | 167.3                  | 153.8 to 172.3                     | 28.7               | 56.6      | 138.0                  | 147.9 to 124.9                     |
| PGAG/PVDF/Hybrid | -                            | -                            | 167.5                  | 155.7 to 175.3                     | 30.1               | 59.4      | 138.6                  | 145.0 to 129.1                     |

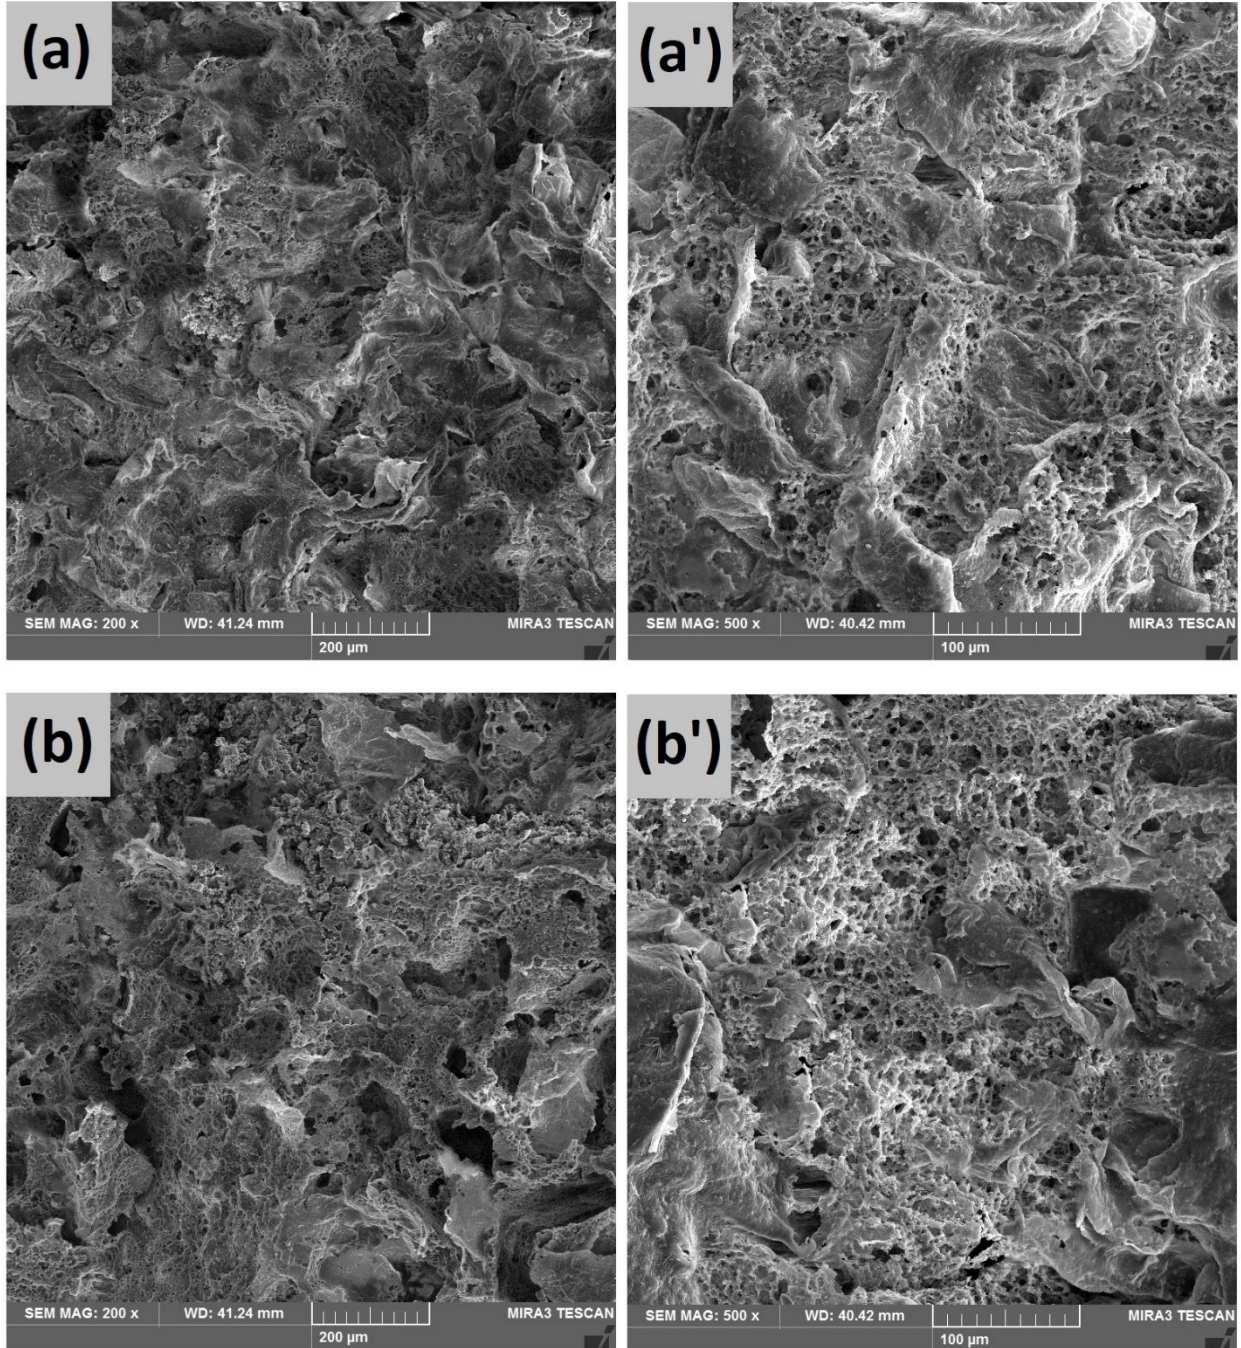

**Figure S2.** SEM images of cross-sectional surfaces of **(a,a')** PGAG/PVDF/nHA and **(b,b')** PGAG/PVDF/Clay.

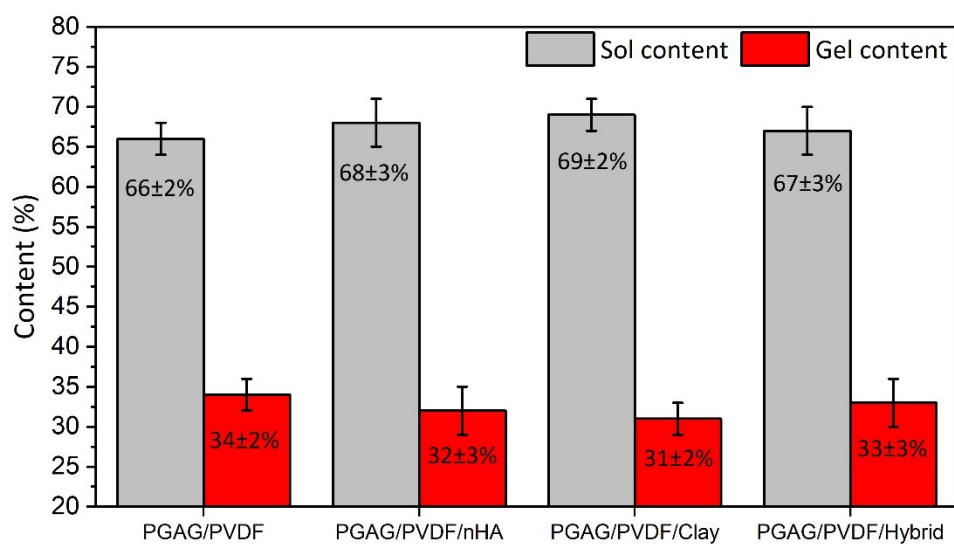

**Figure S3.** Calculated sol-gel content of the scaffolds normalized based on the weight fraction of PGAG in the blends (50%).

**Table S2.** Mechanical properties of the prepared scaffolds.

| Condition                    | Sample           | E (MPa)   | TS at Yield point (MPa) | UTS (MPa) | $\epsilon_b$ (%) |
|------------------------------|------------------|-----------|-------------------------|-----------|------------------|
| As prepared                  | PGAG             | 1.8±0.1   | -                       | 0.95±0.04 | 85.0±2.0         |
|                              | PVDF             | 268.3±2.0 | -                       | 22.0±0.1  | 22.4±1.0         |
|                              | PGAG/PVDF        | 15.7±0.5  | 4.3±0.1                 | 14.2±0.1  | 61.2±1.5         |
|                              | PGAG/PVDF/nHA    | 17.3±0.7  | 5.2±0.1                 | 13.9±0.1  | 57.5±2.0         |
|                              | PGAG/PVDF/Clay   | 23.8±0.6  | 4.9±0.1                 | 14.2±0.1  | 54.0±2.0         |
|                              | PGAG/PVDF/Hybrid | 20.2±0.9  | 5.7±0.2                 | 14.6±0.2  | 54.9±1.5         |
| After Hydrolytic Degradation | PGAG/PVDF        | 10.5±0.7  | 2.5±0.3                 | 7.7±0.3   | 38.8±3.0         |
|                              | PGAG/PVDF/nHA    | 13.7±0.9  | 3.0±0.4                 | 7.9±0.5   | 37.7±2.5         |
|                              | PGAG/PVDF/Clay   | 20.6±1.0  | 3.4±0.4                 | 8.6±0.4   | 35.5±3.0         |
|                              | PGAG/PVDF/Hybrid | 17.8±1.3  | 3.1±0.6                 | 8.3±0.6   | 34.4±2.8         |

\*E - Young's modulus

\*UTS - ultimate tensile strength

\* $\epsilon_b$  - Elongation at break

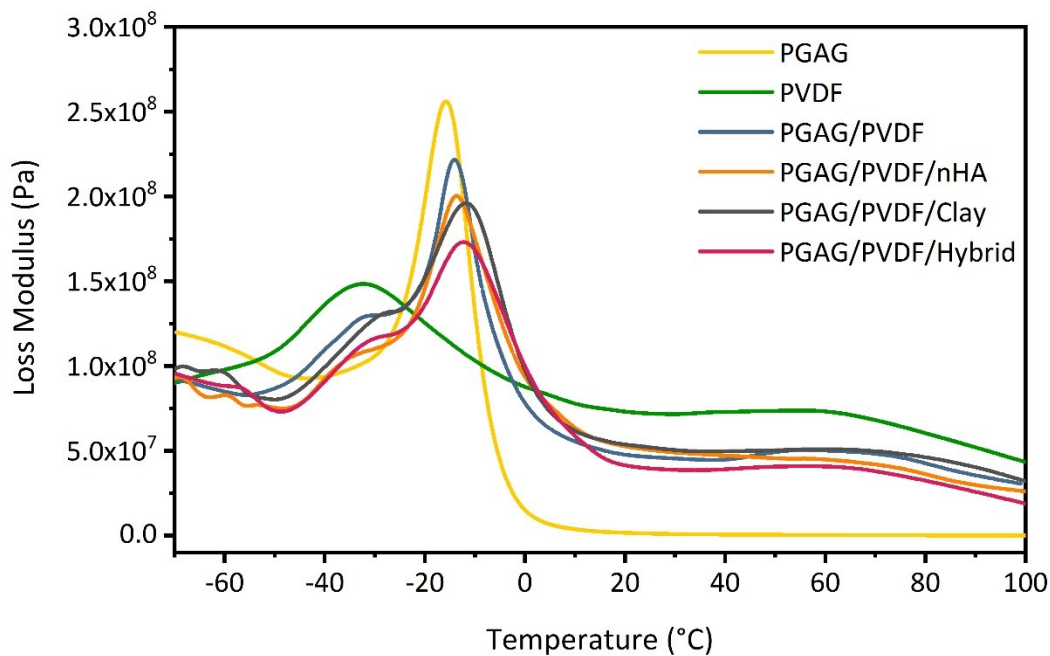

**Figure S4.** Loss modulus ( $E''$ ) of raw PVDF, PGAG, their blend and corresponding nanocomposites.

**Table S3.** Weight loss of the samples during the *in-vitro* degradation within the PBS and PBS+ Lipase enzyme solutions (30 days, 37°C, PH 7.4).

| Sample           | Weight Loss (%) |                       |
|------------------|-----------------|-----------------------|
|                  | PBS enzyme-free | PBS enzyme-containing |
| PGAG/PVDF        | 7.1±0.3         | 22.1±1.3              |
| PGAG/PVDF/nHA    | 8.1±0.3         | 26.8±1.5              |
| PGAG/PVDF/Clay   | 7.6±0.3         | 24.4±1.3              |
| PGAG/PVDF/Hybrid | 8.3±0.2         | 27.4±1.4              |



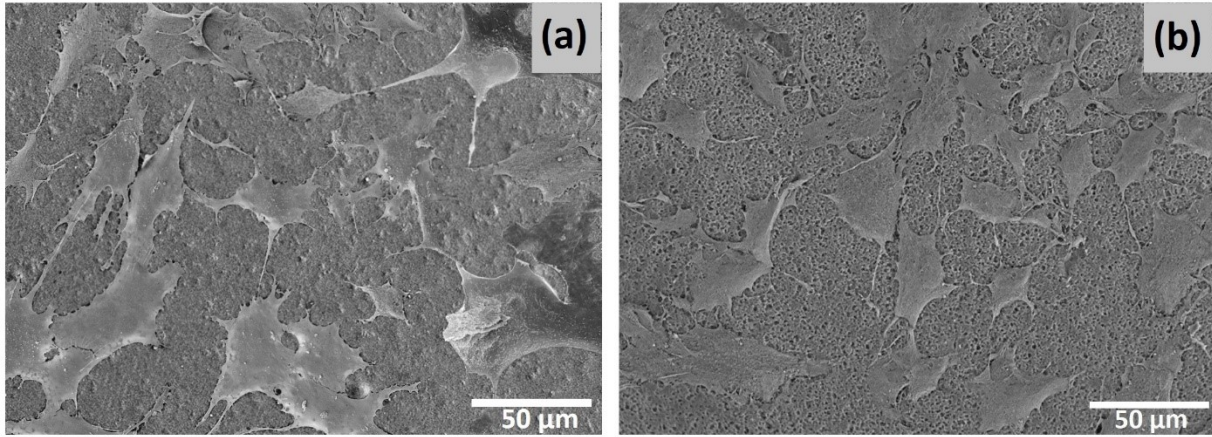

**Figure S5.** SEM images showing the morphology of L929 cells seeded on (a) TCP as the control group and (b) PGAG/PVDF/Hybrid film after 10 days of cell seeding. As shown, normal morphology and shape for mouse fibroblast cells can be seen on day 10.
